# Supplementary material for: Reduction of Polyunsaturated Fatty Acids with Tumor Progression in a Lean Non-Alcoholic Steatohepatitis-Associated Hepatocellular Carcinoma Mouse Model
Source: PubMed Central journal article supplement (PMC7477439; doi:10.7150/jca.48495), 2020-07-20
Supplement: jcav11p5536s1.pdf [file jcav11p5536s1.pdf]

Supplemental Table S1. The table shows the composition of the control diet and the choline deficient high trans-fat/sucrose/cholesterol diet (CD-HFSC). \*Fat is mostly trans-fat from Primex.

| <b>Nutrient</b>       | <b>Control Diet</b> | <b>CD-HFSC Diet</b> |
|-----------------------|---------------------|---------------------|
| Fat (% kcal)          | 10                  | 44.9*               |
| Protein (% kcal)      | 20                  | 20                  |
| Carbohydrate (% kcal) | 70                  | 35.1                |
| Sucrose (% kcal)      | 0                   | 29.1                |
| Cholesterol (% g)     | 0                   | 2                   |
| Choline (% g)         | 0.2                 | 0                   |
| <b>Total Calories</b> | <b>4,057</b>        | <b>4,057</b>        |

Supplemental Table S2. The table shows the thirty fatty acids investigated in this study.

| Fatty Acids                                                                                                                                                                                                                           |                                                                                                                                                                |                                                                                                                                                                                                                                                                                                                                                                                                                                                                                                                                                                                                                        |
|---------------------------------------------------------------------------------------------------------------------------------------------------------------------------------------------------------------------------------------|----------------------------------------------------------------------------------------------------------------------------------------------------------------|------------------------------------------------------------------------------------------------------------------------------------------------------------------------------------------------------------------------------------------------------------------------------------------------------------------------------------------------------------------------------------------------------------------------------------------------------------------------------------------------------------------------------------------------------------------------------------------------------------------------|
| Saturated fatty acids (SFA)                                                                                                                                                                                                           | Monounsaturated fatty acids (MUFAs)                                                                                                                            | Polyunsaturated fatty acids (PUFAs)                                                                                                                                                                                                                                                                                                                                                                                                                                                                                                                                                                                    |
| Lauric acid (C12)<br>Myristic acid (C14)<br>Pentadecanoic acid (C15)<br>Palmitic acid (C16)<br>Margaric acid (C17)<br>Stearic acid (C18)<br>Arachidic acid (C20)<br>Behenic acid (C22)<br>Lignoceric acid (C24)<br>Cerotic acid (C26) | Palmitoleic acid (16:1)<br>Oleic acid (18:1)<br>Eicosenoic acid (20:1)<br>Mead acid (20:3)<br>Heptadecenoic acid<br>Erucic acid (22:1)<br>Nervonic acid (24:1) | Linoleic acid ( $\omega$ -6) (18:2)<br>Linolenic acids $\alpha$ ( $\omega$ -3) & $\gamma$ ( $\omega$ -6) (18:3)<br>Stearidonic acid ( $\omega$ -3) (18:4)<br>Eicosadienoic acid ( $\omega$ -6) (20:2)<br>Dihomo- $\gamma$ -linolenic acid ( $\omega$ -6) (20:3)<br>Arachidonic acid ( $\omega$ -6) (20:4)<br>Eicosapentaenoic acid ( $\omega$ -3) (20:5)<br>Docosadienoic acid ( $\omega$ -6) (22:2)<br>Docosatrienoic acid ( $\omega$ -3) (22:3)<br>Adrenic acid ( $\omega$ -6) (22:4)<br>Clupanodonic acid ( $\omega$ -3) (22:5)<br>Osbond acid ( $\omega$ -6) (22:5)<br>Docosaheptaenoic acid ( $\omega$ -3) (22:6) |

Supplemental Table S3. Gross observations of mice fed the control diet and the CS-HFSC diet upon necropsy. Mice fed the CD-HFSC diet had enlarged livers, significantly higher liver to body weight ratio and enlarged spleens compared to mice fed the control diet.

|                            | Control Diet                                          | CD-HFSC Diet                                              | p value                |
|----------------------------|-------------------------------------------------------|-----------------------------------------------------------|------------------------|
| Average liver weight       | 1.57 g<br>(+/- 0.16 g)                                | 4.41 g<br>(+/- 0.79 g)                                    | $1.56 \times 10^{-16}$ |
| Average liver size         | 598.33mm <sup>2</sup><br>(+/-115.17 mm <sup>2</sup> ) | 1002.56 mm <sup>2</sup><br>(+/- 1181.29 mm <sup>2</sup> ) | $2.63 \times 10^{-9}$  |
| Average spleen weight      | 0.11 g<br>(+/- 0.06 g)                                | 0.24 g<br>(+/- 0.06 g)                                    | $2.99 \times 10^{-18}$ |
| Liver weight : body weight | 0.04                                                  | 0.14                                                      | $2.44 \times 10^{-7}$  |
| Max nodule number          | 0                                                     | 24                                                        |                        |
| Min nodule number          | 0                                                     | 1                                                         |                        |
| Average nodule #           | 0                                                     | 11                                                        |                        |
| Median nodule #            | 0                                                     | 11                                                        |                        |
| Max nodule size            | 0                                                     | 600 mm <sup>2</sup>                                       |                        |
| Min nodule size            | 0                                                     | 1 mm <sup>2</sup>                                         |                        |
| Average nodule size        | 0                                                     | 44.20 mm <sup>2</sup>                                     |                        |
| Median nodule size         | 0                                                     | 4.5 mm <sup>2</sup>                                       |                        |
| Regenerative nodules       | 0                                                     | Max: 8<br>Average: 3.6                                    |                        |
| Dysplastic nodules         | 0                                                     | Max: 8<br>Average: 3.6                                    |                        |
| Average HCC                | 0                                                     | Max: 4<br>Average: 1.1                                    |                        |

Supplemental Table S4. The tables shows a list of fatty acids whose levels were reduced at 32 or 55 weeks of age. No differences were observed between mice with pre-malignant nodules and mice with HCC. Six fatty acids (*italic*) were significantly reduced at both 32 and 55 weeks. Polyunsaturated fatty acids = PUFA; monounsaturated fatty acids = MUFA; saturated fatty acids = SFA

| <b>Plasma Fatty Acid Reduction at 32 weeks</b>                              | <b>p value</b>        |
|-----------------------------------------------------------------------------|-----------------------|
| <i>Eicosapentaenoic acid (PUFA)</i>                                         | $3.82 \times 10^{-5}$ |
| <i>Docosahexaenoic acid (PUFA)</i>                                          | 0.002268              |
| Arachidonic acid (PUFA)                                                     | 0.007774              |
| Docosapentaenoic acid (n-3; PUFA)                                           | 0.009972              |
| <i>Palmitoleic acid (MUFA)</i>                                              | 0.016617              |
| <i>Linoleic acid (PUFA)</i>                                                 | 0.019494              |
| Docosadienoic acid (PUFA)                                                   | 0.020973              |
| <i>Linolenic acids (<math>\alpha</math> and <math>\gamma</math>) (PUFA)</i> | 0.030345              |
| <i>Arachidic acid (SFA)</i>                                                 | 0.035144              |
| Dihomo-g-linolenic acid (PUFA)                                              | 0.041485              |
| Heptadecenoic acid (MUFA)                                                   | 0.045548              |
| <b>Plasma Fatty Acid Reduction at 55 weeks</b>                              | <b>p value</b>        |
| Eicosapentaenoic acid (PUFA)                                                | $1.58 \times 10^{-5}$ |
| Linolenic acids ( $\alpha$ and $\gamma$ ) (PUFA)                            | 0.000178              |
| Oleic acid (MUFA)                                                           | 0.000399              |
| Docosapentaenoic acid (n-6; PUFA)                                           | 0.001066              |
| Stearidonic acid (PUFA)                                                     | 0.00299               |
| Docosahexaenoic acid (PUFA)                                                 | 0.011437              |
| Arachidic acid (SFA)                                                        | 0.012421              |
| Palmitoleic acid (MUFA)                                                     | 0.012511              |
| Linoleic acid (PUFA)                                                        | 0.014917              |

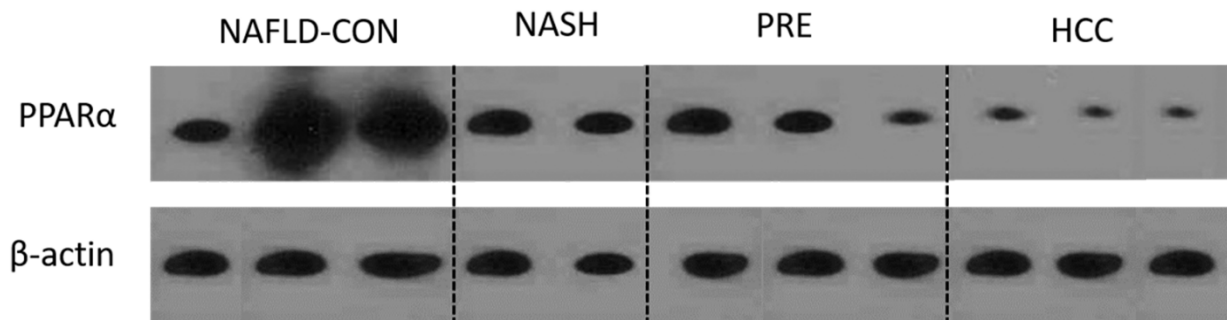

**Supplemental Figure 1.** PPAR $\alpha$  expression in NASH tissue, HCC and pre-malignant (PRE) nodules from mice fed the CD-HFSC diet, and NAFLD tissue from mice fed the control diet (NAFLD-CON). Western blot analyses were conducted using PPAR $\alpha$ -specific antibodies and  $\beta$ -actin antibodies (loading control). Overall PPAR $\alpha$  protein expression is lower in NASH tissue, pre-malignant lesions and tumors of mice fed the CD-HFSC diet compared to the NAFLD tissue from mice fed the control diet. The levels of PPAR $\alpha$  protein are lower in HCC compared to pre-malignant lesions and NASH tissue.
